# Supplementary material
Source: PubMed Central journal article supplement (PMC6037917)
Supplement: tom-00217-16-s001.pdf [file tom-00217-16-s001.pdf]

## APPENDIX:

### Derivations of DSC-MRI Concentration-Time Curves

#### Conventional DSC-MRI

The concentration-time curves in DSC-MRI are generated based on an assumed linear relationship between gadolinium concentration and the change in *apparent transverse* relaxation rate:

$$\Delta R_2(t) = \frac{1}{T_2^*(t)} - \frac{1}{T_{20}^*} = \kappa[Gd](t) \quad (A1)$$

where  $\kappa$  is a constant dependent on transverse relaxivity, field strength, pulse sequence, and vascular morphology (3).

The generalized signal equation for conventional DSC-MRI is:

$$S(t) = S_0 \sin\theta \left[ \frac{1 - e^{\frac{-TR}{T_1(t)}}}{1 - \cos\theta e^{\frac{-TR}{T_1(t)}}} \right] e^{\frac{-TE}{T_2^*(t)}} \quad (A2)$$

where  $T_1(t)$  and  $T_2^*(t)$  indicate that these parameters can change dynamically during acquisition. An expression for  $1/T_2^*(t)$  is obtained by inverting Eq. A2:

$$\frac{1}{T_2^*(t)} = \frac{-1}{TE} \ln \left[ \frac{S(t)}{S_0 \sin\theta \left[ \frac{1 - e^{\frac{-TR}{T_1(t)}}}{1 - \cos\theta e^{\frac{-TR}{T_1(t)}}} \right]} \right] \quad (A3)$$

In order to determine the change in apparent transverse relaxation rate (i.e.,  $\Delta R_2^*(t)$ ) an estimate of the pre-contrast apparent transverse relaxation rate (i.e.,  $T_{20}^*$ ) must also be obtained. First, the pre-contrast baseline signal,  $S_B$ , is determined by averaging  $S(t)$  over the first  $N_B$  baseline points:

$$S_B = \frac{1}{N_B} \sum_{i=1}^{N_B} \left[ S_0 \sin\theta \left[ \frac{1 - e^{\frac{-TR}{T_{10}}}}{1 - \cos\theta e^{\frac{-TR}{T_{10}}}} \right] e^{\frac{-TE}{T_{20}^*}} \right] \quad (A4)$$

Note that because the contrast agent has not yet been administered, constant initial values of  $T_{10}$  and  $T_{20}^*$  are used in the expression. Second, substituting  $S_B$  for  $S(t)$  and  $T_{20}^*$  for  $T_2^*(t)$  in Eq. A2, an expression for  $1/T_{20}^*$  can be obtained. Finally, substituting the expressions for  $1/T_2^*(t)$  and  $1/T_{20}^*$  into Eq. A1 gives:

$$\Delta R_2^*(t) = \frac{-1}{TE} \ln \left[ \frac{S(t)}{\left[ \frac{1 - e^{\frac{-TR}{T_1(t)}}}{1 - \cos\theta e^{\frac{-TR}{T_1(t)}}} \right] \frac{\left[ \frac{1 - e^{\frac{-TR}{T_{10}}}}{1 - \cos\theta e^{\frac{-TR}{T_{10}}}} \right]}{S_B}} \right] \quad (A5)$$

Eq. A5 demonstrates the potential influence of dipolar  $T_1$  effects on concentration-time curves obtained with DSC-MRI. In the presence of an intact BBB, the contrast agent remains confined to the vasculature

(i.e., no extravasation occurs),  $T_1(t)$  is essentially equal to  $T_{10}$  (i.e., its pre-contrast value), and  $\Delta R_2^*(t)$  reduces to its ubiquitous form:

$$\Delta R_2^*(t) = \frac{-1}{TE} \ln\left(\frac{S(t)}{S_B}\right) \quad (\text{A6})$$

*Correction of DSC-MRI Time Courses for  $T_1$  Extravasation Effects*

Dual-echo acquisition methods provide an effective means by which confounding dipolar  $T_1$  leakage effects can be eliminated from DSC-MRI time courses (17-21). The signal equations for the first ( $TE_1$ ) and second ( $TE_2$ ) echoes are:

$$S_{TE_1}(t) = S_0 \sin\theta \left[ \frac{1 - e^{-\frac{TR}{T_1(t)}}}{1 - \cos\theta e^{-\frac{TR}{T_1(t)}}} \right] e^{-\frac{TE_1}{T_2^*(t)}} \quad (\text{A7})$$

and

$$S_{TE_2}(t) = S_0 \sin\theta \left[ \frac{1 - e^{-\frac{TR}{T_1(t)}}}{1 - \cos\theta e^{-\frac{TR}{T_1(t)}}} \right] e^{-\frac{TE_2}{T_2^*(t)}} \quad (\text{A8})$$

respectively. Taking the ratio of the two signal equations, an expression for  $1/T_2^*(t)$  can be obtained:

$$\frac{1}{T_2^*(t)} = \frac{1}{(TE_2 - TE_1)} \ln\left(\frac{S_{TE_1}(t)}{S_{TE_2}(t)}\right) \quad (\text{A9})$$

Again, the pre-contrast apparent transverse relaxation rate (i.e.,  $1/T_{20}^*$ ) must be estimated in order to determine the change in apparent transverse relaxation rate. Following the methodology described in the previous section, an expression for  $1/T_{20}^*$  is obtained from the ratio of the baseline signals:

$$\frac{1}{T_{20}^*} = \frac{1}{(TE_2 - TE_1)} \ln\left(\frac{S_{TE_1B}}{S_{TE_2B}}\right) \quad (\text{A10})$$

Substituting the results of Eq. A9 and A10 into Eq. A1, we obtain the relationship:

$$\Delta R_2^*(t) = \frac{1}{(TE_2 - TE_1)} \ln\left(\frac{S_{TE_1}(t)}{S_{TE_2}(t)} \frac{S_{TE_2B}}{S_{TE_1B}}\right) \quad (\text{A11})$$

Eq. A11 is the DSC-MRI concentration-time curve free from dipolar  $T_1$  leakage effects.

*Correction of DSC-MRI Time Courses for  $T_2/T_2^*$  Effects*

In practice, we have observed another potential confounding effect on DSC-MRI concentration-time curves apparent as elevated endlines, which develop following the first pass of contrast agent, an effect due to recirculation and/or contrast agent leakage effects. To correct the corrupted  $\Delta R_2^*(t)$  concentration-time curves, the data are fit on voxel-wise basis to a gamma-variate plus its cumulative integral, as introduced by Johnson et al (24):

$$\Delta R_2^*(t)' = k(t - t_0)^\alpha e^{-\frac{(t-t_0)}{\beta}} + h \int_0^t k(t' - t_0)^\alpha e^{-\frac{(t-t_0)}{\beta}} dt' \quad (\text{A12})$$

where  $k$  is a scale factor,  $t_0$  is the appearance time of the bolus,  $\alpha$ , and  $\beta$  are fit parameters, and  $h$  is used to scale the cumulative integral of the gamma-variate. After non-linear least squares fitting,  $\Delta R_2^*(t)$  curves corrected for dipolar  $T_1$  and  $T_2$  and residual susceptibility effects are generated by constructing gamma-variates using the parameters estimated from the full model fit:

$$\Delta R_2^*(t)' = k(t - t_0)^\alpha e^{-\frac{(t-t_0)}{\beta}} \quad (\text{A13})$$

Conventional algorithms can then be applied to generate estimates of DSC-MRI parameters from these corrected time courses.

### Derivations of DCE-MRI Concentration-Time Curves

#### *Conventional DCE-MRI*

The concentration-time curves in DCE-MRI are generated based on an assumed linear relationship between gadolinium concentration and the change in *spin-lattice* relaxation rate:

$$\Delta R_1(t) = \frac{1}{T_1(t)} - \frac{1}{T_{10}} = \mathfrak{R}_1[Gd](t) \quad (\text{A14})$$

Analogous to DSC-MRI, the generalized signal equation for DCE-MRI is then equivalent to that in Eq. A2. Then, the  $1/T_1(t)$  and  $1/T_{10}$  are obtained directly by solving the pre- and post-contrast signal equations and the results, along with Eq. A14, are used to determine  $\Delta R_1(t)$ . To begin,  $1/T_1(t)$  is obtained by inverting Eq. A2:

$$\frac{1}{T_1(t)} = \frac{-1}{TR} \ln \left[ \frac{S_0 \sin \theta e^{\frac{-TE}{T_2^*(t)} - S(t)}}{S_0 \sin \theta e^{\frac{-TE}{T_2^*(t)} - S(t)} \cos \theta} \right] \quad (\text{A15})$$

In order to determine the change in spin lattice relaxation rate (i.e.,  $\Delta R_1(t)$ ), an estimate of the pre-contrast spin lattice relaxation rate (i.e.,  $T_{10}$ ) must be obtained. Following the methodology described in the previous sections, an expression for  $1/T_{10}$  is obtained by inverting the pre-contrast baseline signal,  $S_B$ , constructed by averaging  $S(t)$  over the first  $N_B$  baseline points:

$$\frac{1}{T_0} = \frac{-1}{TR} \ln \left[ \frac{S_0 \sin \theta e^{\frac{-TE}{T_2^*(t)} - S_B}}{S_0 \sin \theta e^{\frac{-TE}{T_2^*(t)} - S_B} \cos \theta} \right] \quad (\text{A16})$$

Substituting Eq. A15 and A16 into Eq. A14:

$$\Delta R_1(t) = \frac{-1}{TR} \ln \left[ \frac{\left[ \frac{S_0 \sin \theta e^{\frac{-TE}{T_2^*(t)} - S(t)}}{S_0 \sin \theta e^{\frac{-TE}{T_2^*(t)} - S(t)} \cos \theta} \right]}{\left[ \frac{S_0 \sin \theta e^{\frac{-TE}{T_2^*(t)} - S_B}}{S_0 \sin \theta e^{\frac{-TE}{T_2^*(t)} - S_B} \cos \theta} \right]} \right] \quad (\text{A17})$$

Eq. A17 demonstrates the potential influence of  $T_2^*$  effects on concentration-time curves obtained with DCE-MRI. Specifically,  $T_2^*$  shortening will cause a confounding reduction in  $\Delta R_1(t)$ . However, since

minimum echo times are used in DCE-MRI to obtain good  $T_1$  weighting, it is widely assumed that insignificant phase dispersion will occur over time scales of short TE (i.e.,  $TE \ll T_2^*$ ). Consequently,  $T_2^*$  effects are generally ignored, which results in the following approximation:

$$\Delta R_1(t) \approx \frac{-1}{TR} \ln \left[ \frac{S_0 \sin\theta - S(t)}{S_0 \sin\theta - S(t) \cos\theta} \right] \left[ \frac{S_0 \sin\theta - S_B \cos\theta}{S_0 \sin\theta - S_B} \right] \quad (\text{A18})$$

Note that since  $T_{10}$  is determined directly from the pre-contrast baseline signal intensity, **Eq. A18 does not exhibit a dependence on the initial, pre-contrast spin lattice relaxation time. Therefore, this approach eliminates the necessity of acquiring a separate pre-contrast  $T_1$  map.** Furthermore, notice that  $\Delta R_1(t)$  can be estimated directly from  $S(t)$ , provided that an estimate of  $S_0$  be obtained.

Assuming fully relaxed spins,  $S_0$  can be estimated from a single-shot, single repetition (i.e., infinite TR), dual gradient-echo acquisition. In the limit that  $TR \rightarrow \infty$ , the signal equations for the first and second echoes (i.e., Eq. A7 and A8) reduce to:

$$S_{TE_{10}} = S_0 \sin\theta e^{\frac{-TE_1}{T_{20}^*}} \quad (\text{A19})$$

and

$$S_{TE_{20}} = S_0 \sin\theta e^{\frac{-TE_2}{T_{20}^*}} \quad (\text{A20})$$

Using the same methodology that was used to generate Eq. A10,  $1/T_{20}^*$  is estimated as:

$$\frac{-1}{T_{20}^*} = \frac{1}{(TE_2 - TE_1)} \ln \left( \frac{S_{TE_{10}}}{S_{TE_{20}}} \right) \quad (\text{A21})$$

Substituting Eq. A21 into Eq. A19,  $S_0$  is estimated as:

$$S_0 = \frac{S_{TE_{10}}}{\sin\theta} e^{\frac{TE_1}{(TE_2 - TE_1)}} \ln \left( \frac{S_{TE_{10}}}{S_{TE_{20}}} \right) \quad (\text{A22})$$

The estimate of  $S_0$  is then substituted into Eq. A18 to obtain the change in spin lattice relaxation rate, which is then used to determine the concentration-time curves using Eq. A14.

#### *Correction of DCE-MRI Time Courses for $T_2/T_2^*$ Effects*

Confounding  $T_2^*$  effects of the contrast agent can be eliminated from the DCE-MRI concentration-time curves when collecting SPICE data. First,  $1/T_2^*(t)$  is estimated at each time point from the first and second echo signal using Eq. A9. Second, a corrected first echo signal,  $S_{TE_{1C}}(t)$  is obtained by extrapolating each time point of the first echo signal in Eq. A8 back to  $TE=0$  using:

$$S_{TE_{1C}}(t) = S_{TE_1}(t) e^{\frac{+TE_1}{T_2^*(t)}} = S_0 \sin\theta \left[ \frac{1 - e^{\frac{-TR}{T_1(t)}}}{1 - \cos\theta e^{\frac{-TR}{T_1(t)}}} \right] \quad (\text{A23})$$

Notice that  $T_2^*$  effects have been eliminated in the corrected signal equation. Using the methodology used to generate Eq. A15, an expression for  $1/T_1(t)$  can be obtained:

$$\frac{-1}{T_1(t)} = \frac{-1}{TR} \ln \left( \frac{S_0 \sin \theta - S_{TE_1}(t)}{S_0 \sin \theta - S_{TE_1C}(t) \cos \theta} \right) \quad (\text{A24})$$

In order to determine the change in spin lattice relaxation rate (i.e.,  $\Delta R_1(t)$ ), an estimate of the pre-contrast spin lattice relaxation rate (i.e.,  $T_{10}$ ) must be obtained. Following the methodology described in the previous sections, an expression for  $1/T_{10}$  is obtained by inverting the pre-contrast baseline signal,  $S_{BC}$ , constructed by averaging  $S(t)$  over the first  $N_B$  baseline points:

$$\frac{1}{T_0} = \frac{-1}{TR} \ln \left[ \frac{S_0 \sin \theta - S_{BC}}{S_0 \sin \theta - S_{BC} \cos \theta} \right] \quad (\text{A25})$$

Substituting Eq. A24 and A25 into Eq.A14:

$$\Delta R_1(t) = \frac{-1}{TR} \ln \left[ \left[ \frac{S_0 \sin \theta - S_{TE_1C}(t)}{S_0 \sin \theta - S_{TE_1C}(t) \cos \theta} \right] \left[ \frac{S_0 \sin \theta - S_{BC} \cos \theta}{S_0 \sin \theta - S_{BC}} \right] \right] \quad (\text{A26})$$

Eq. A26 is the  $\Delta R_1(t)$  curve corrected for confounding  $T_2^*$  effects. An estimate of  $S_0$ , determined from the first time point of the single-shot, dual-echo acquisition using Eq. A22, is then substituted into Eq. A26 to obtain the change in spin lattice relaxation rate, which is then used to determine the concentration-time curves from which the perfusion parameters are determined.
